# Supplementary material for: A novel humanized Frizzled-7-targeting antibody enhances antitumor effects of Bevacizumab against triple-negative breast cancer via blocking Wnt/β-catenin signaling pathway
Source: PubMed Central journal article supplement (PMC7802198; doi:10.1186/s13046-020-01800-x), 2021-01-12
Supplement: 13046_2020_1800_MOESM8_ESM.pdf [file 13046_2020_1800_MOESM8_ESM.pdf]

1 **Supplementary Materials and Methods**

2

3 **Detection of Fzd7 expression in Bevacizumab-treated TNBC cells and tumor**  
4 **tissues**

5

6 MDA-MB-231/MDA-MB-468 cells were treated with Bevacizumab (200 nmol/L) for  
7 24 h under serum deprivation condition, then the whole cell proteins were extracted.

8 Western blots were probed with  $\alpha$ -Fzd7 (Abcam, USA). The xenograft tumors of

9 MDA-MB-231/MDA-MB-468 cells in nude mice was established. When the average

10 tumor volume reached 50 mm<sup>3</sup>, mice were randomized into 2 groups (n = 5 for each

11 group), and the administration began: (1) PBS control; (2) 5 mg/kg Bevacizumab

12 (intravenous injection, twice a week). For Fzd7-Hypoxyprobe double labeling, mice

13 were injected intravenously with 60 mg/kg of the pimonidazole solution, 90 min later,

14 the mice were euthanatized and tumor tissues were then removed and snap-frozen.

15 Frozen tissue sections were then interrogated with FITC-conjugated  $\alpha$ -pimonidazole

16 and  $\alpha$ -Fzd7 followed by respective Cy3-conjugated secondary IgG. Coverslips were

17 then mounted with DAPI stain solution.

18

19 **Humanized design of SHH002**

20

21 SHH002 is a murine monoclonal antibody targeting Frizzled-7 obtained by our lab

22 through the hybridoma technology, SHH002 exhibited high affinity with rhFzd7 (KD

23 <  $1.0 \times 10^{-12}$  M), the subtype of heavy chain is IgG2b, the subtype of light chain is  
24 Kappa. The template of humanized design was determined after the comparison of  
25 variable region sequences of SHH002 with Human Germline sequences library. Then,  
26 the Discoverystudio software was utilized to complete the humanized design of  
27 SHH002, mouse-derived amino acids critical to the structural stability of antibodies  
28 were retained, and the amino acid residues of non-critical sites were mutated into  
29 human amino acids.

30

### 31 **Silencing the expression of Fzd7**

32

33 The shRNA of Fzd7 (h-Fzd7 shRNA, Top strand:  
34 GATCCGCGCTCATGAACAAGTTCGGCTTCCATTCAAGAGATGGAAGCCGAA  
35 CTTGTTCATGAGCGTTTTTTG; Bottom strand:  
36 AATTCAAAAACGCTCATGAACAAGTTCGGCTTCCATCTCTTGAATGGAAG  
37 CCGAACTTGTTTCATGAGCGCG) was designed, and the lentiviral vector  
38 pHBLV-U6-MCS-CMV-ZsGreen-PGK-PURO was used. Then, h-Fzd7 shRNA was  
39 used to disrupt the expression of Fzd7, and h-Fzd7 shRNA-virus-transduced TNBC  
40 cells were set as a positive control in the IF and Western blot assays of the expression  
41 and localization of  $\beta$ -catenin.

42

### 43 **Sphere formation assay**

44

45 MDA-MB-231/MDA-MB-468 cells were treated by Bevacixumab (200  
46 nmol/L)/Bevacixumab (200 nmol/L) + SHH002-hu1 (100 nmol/L) for 48 h, then  $5 \times$   
47  $10^3$  dissociated MDA-MB-231/MDA-MB-468 cells were seeded on ultralow  
48 attachment 6-well plates in serum-free medium DMEM/F12 (Gibco, Grand Island,  
49 USA) supplemented with B27 (Gibco, Grand Island, USA), 20 ng/mL human  
50 recombinant fibroblast growth factor (FGF), and 20 ng/mL epidermal growth factor  
51 (EGF, Sino Biological Inc., Beijing, China). The mammospheres (diameter  $> 60 \mu\text{m}$ )  
52 were counted under an OLYMPUS inversion fluorescence microscope.
